# Supplementary material for: Transcriptome alterations in myotonic dystrophy frontal cortex
Source: PubMed Central journal article supplement (PMC9272850; doi:10.1016/j.celrep.2020.108634), 2021-01-19
Supplement: NIHMS1821080-supplement-Document_S1.pdf [file NIHMS1821080-supplement-Document_S1.pdf]

**Cell Reports, Volume 34**

## **Supplemental Information**

### **Transcriptome alterations in myotonic dystrophy frontal cortex**

**Brittney A. Otero, Kiril Poukalov, Ryan P. Hildebrandt, Charles A. Thornton, Kenji Jinnai, Harutoshi Fujimura, Takashi Kimura, Katharine A. Hagerman, Jacinda B. Sampson, John W. Day, and Eric T. Wang**

# Figure S1

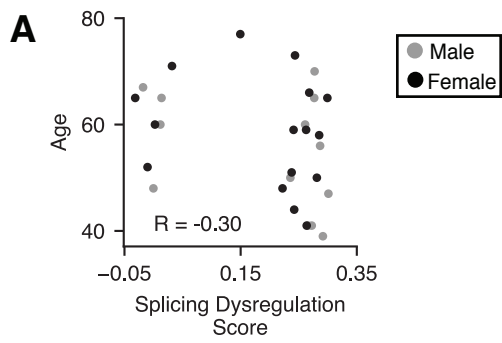

**Figure S1 (Related to Fig. 1-2). Splicing dysregulation does not correlate with age or show sex bias.** A) Scatter of patient ages versus splicing dysregulation score with Pearson  $R = -0.30$ . Sex of each individual is indicated by differences in color; males are in gray and females in black. B) Histograms of CTG repeat lengths as assessed by Bionano Saphyr. C) Histogram of measurements merged from all 7 DM1 samples studied.

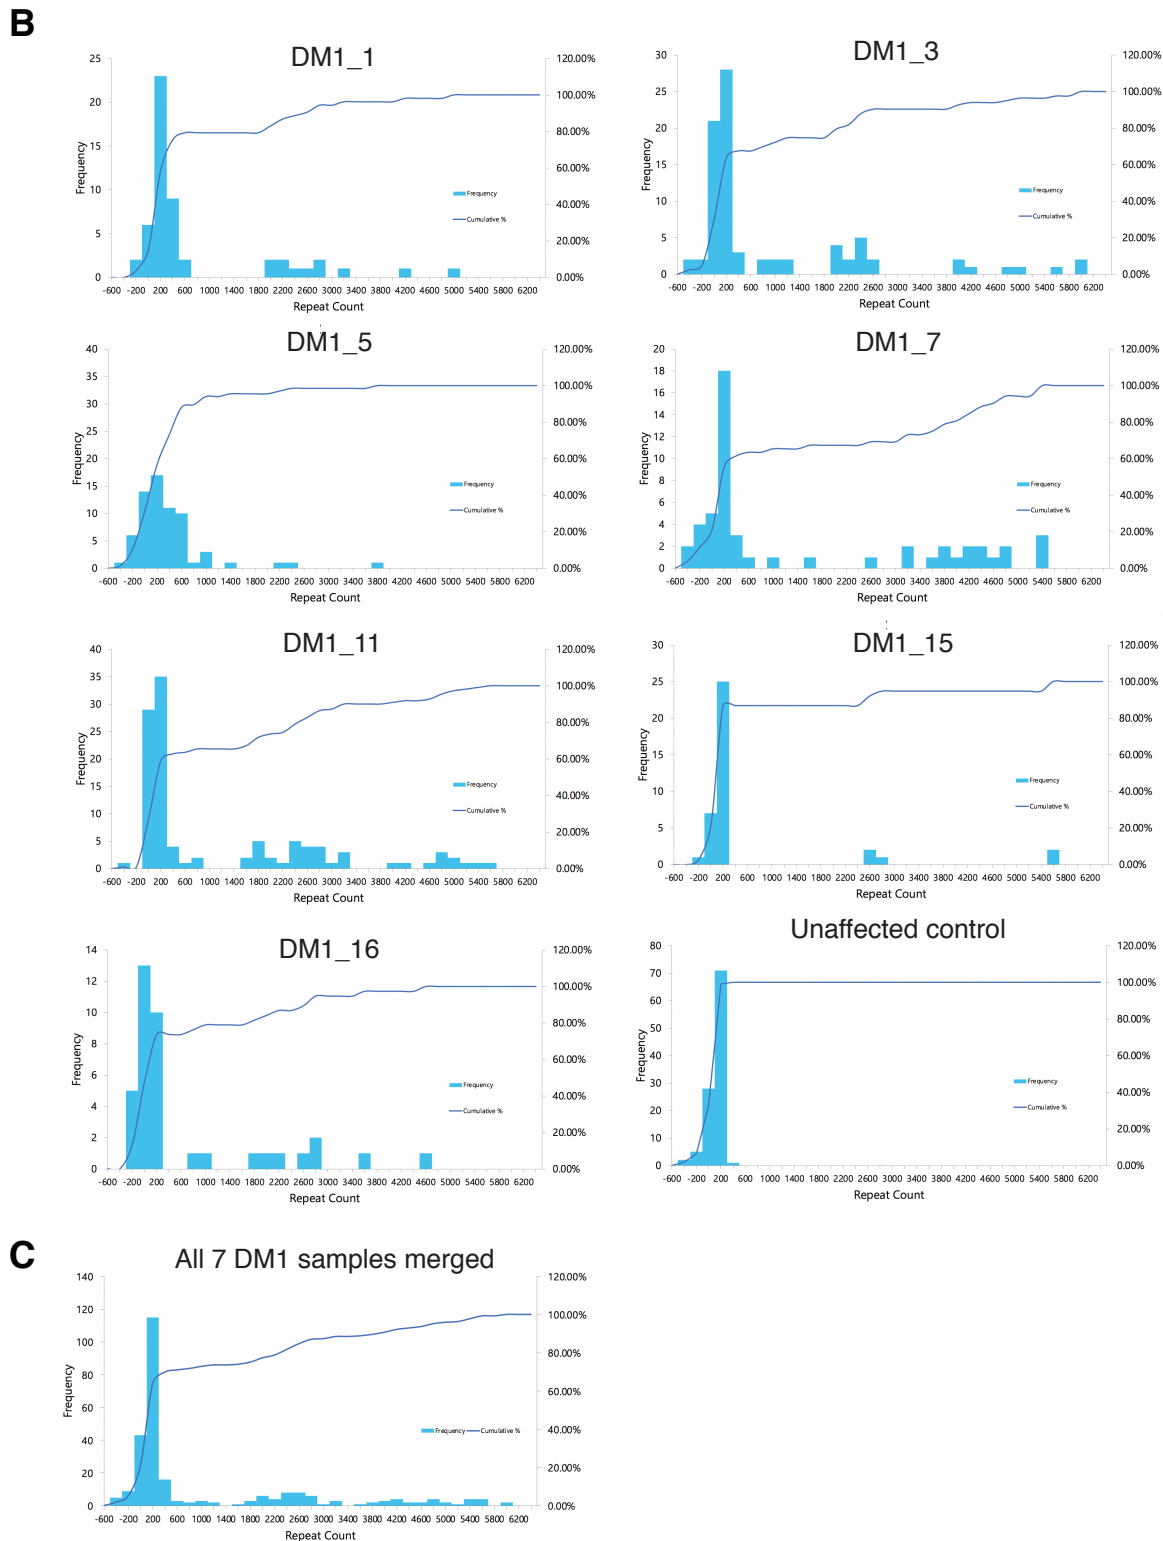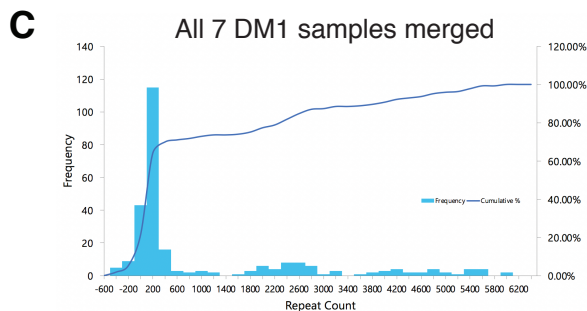

## Figure S2

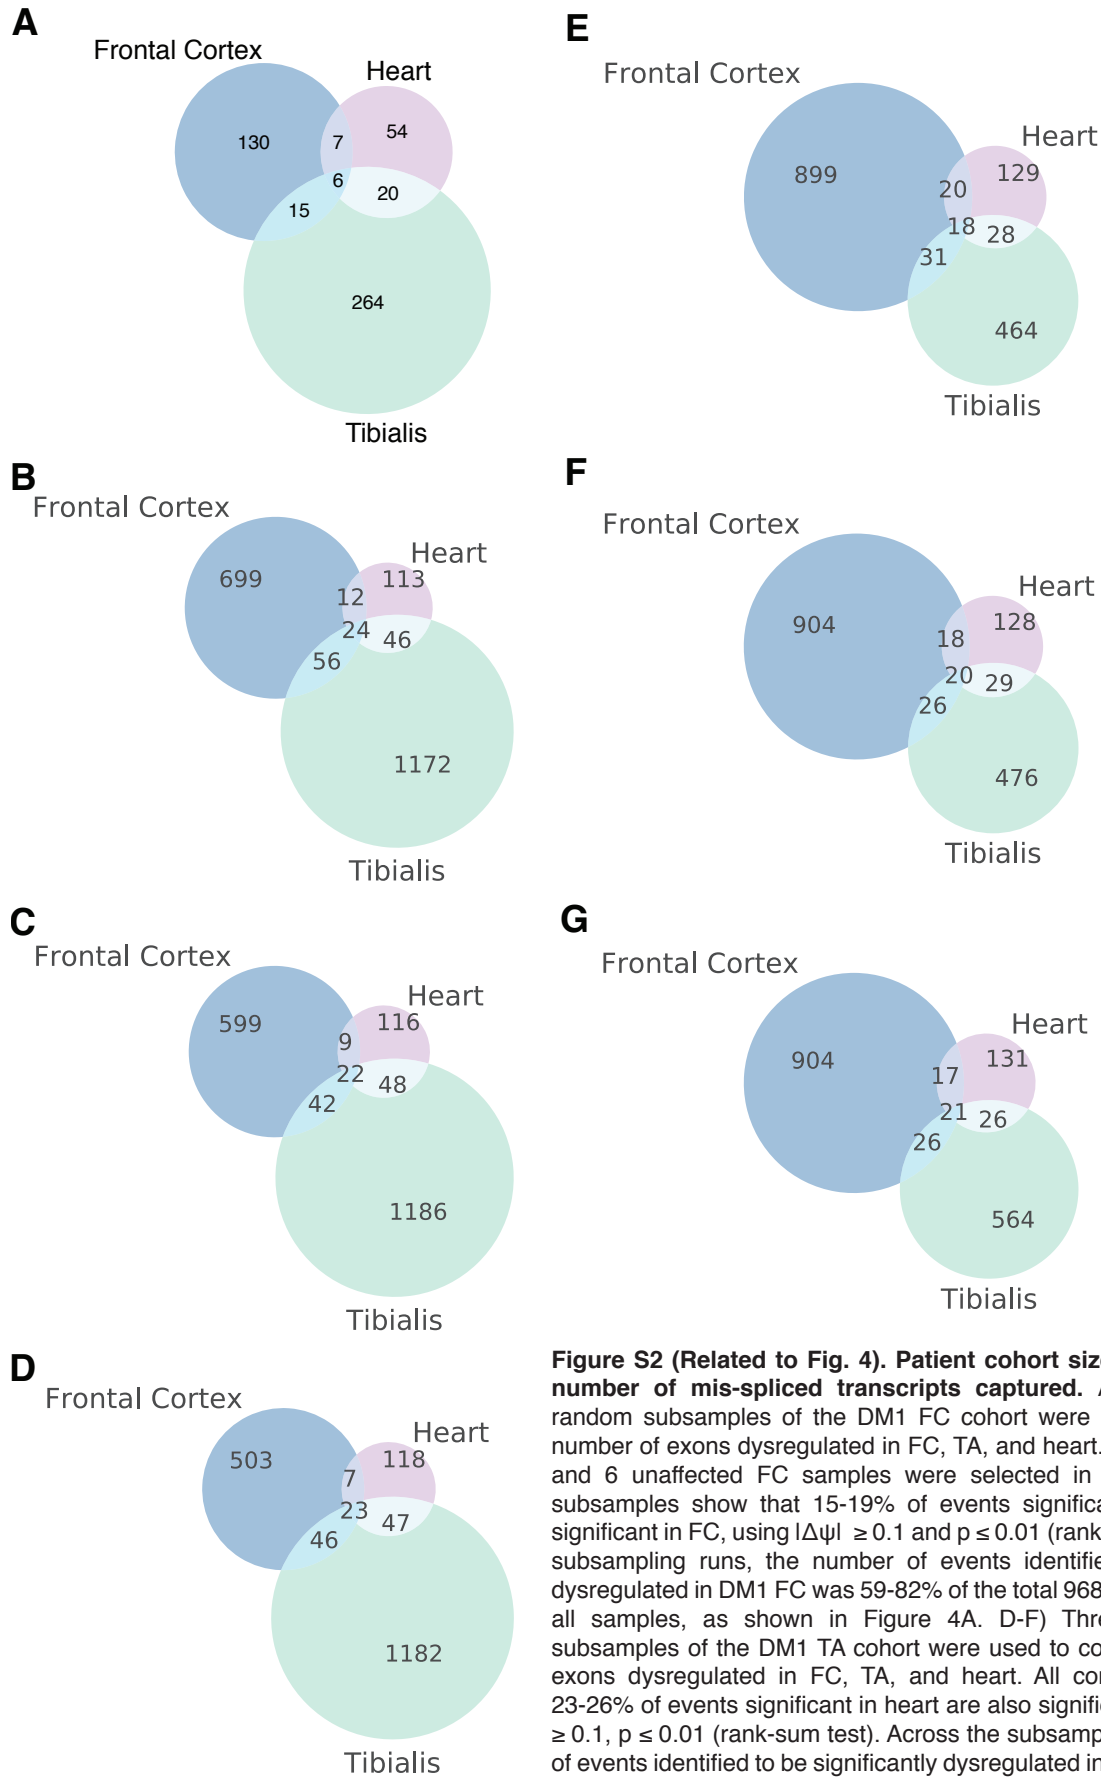

**Figure S2 (Related to Fig. 4). Patient cohort size largely affects the number of mis-spliced transcripts captured.** A-C) Three separate random subsamples of the DM1 FC cohort were used to compute the number of exons dysregulated in FC, TA, and heart. 12 DM1 FC samples and 6 unaffected FC samples were selected in each subsample. All subsamples show that 15-19% of events significant in heart are also significant in FC, using  $|\Delta\psi| \geq 0.1$  and  $p \leq 0.01$  (rank-sum test). Across the subsampling runs, the number of events identified to be significantly dysregulated in DM1 FC was 59-82% of the total 968 identified when using all samples, as shown in Figure 4A. D-F) Three separate random subsamples of the DM1 TA cohort were used to compute the number of exons dysregulated in FC, TA, and heart. All comparisons show that 23-26% of events significant in heart are also significant in TA, using  $|\Delta\psi| \geq 0.1$ ,  $p \leq 0.01$  (rank-sum test). Across the subsampling runs, the number of events identified to be significantly dysregulated in DM1 TA was 41-50% of the total 1298 identified when using all samples, as shown in Figure 4A.

**Figure S3**

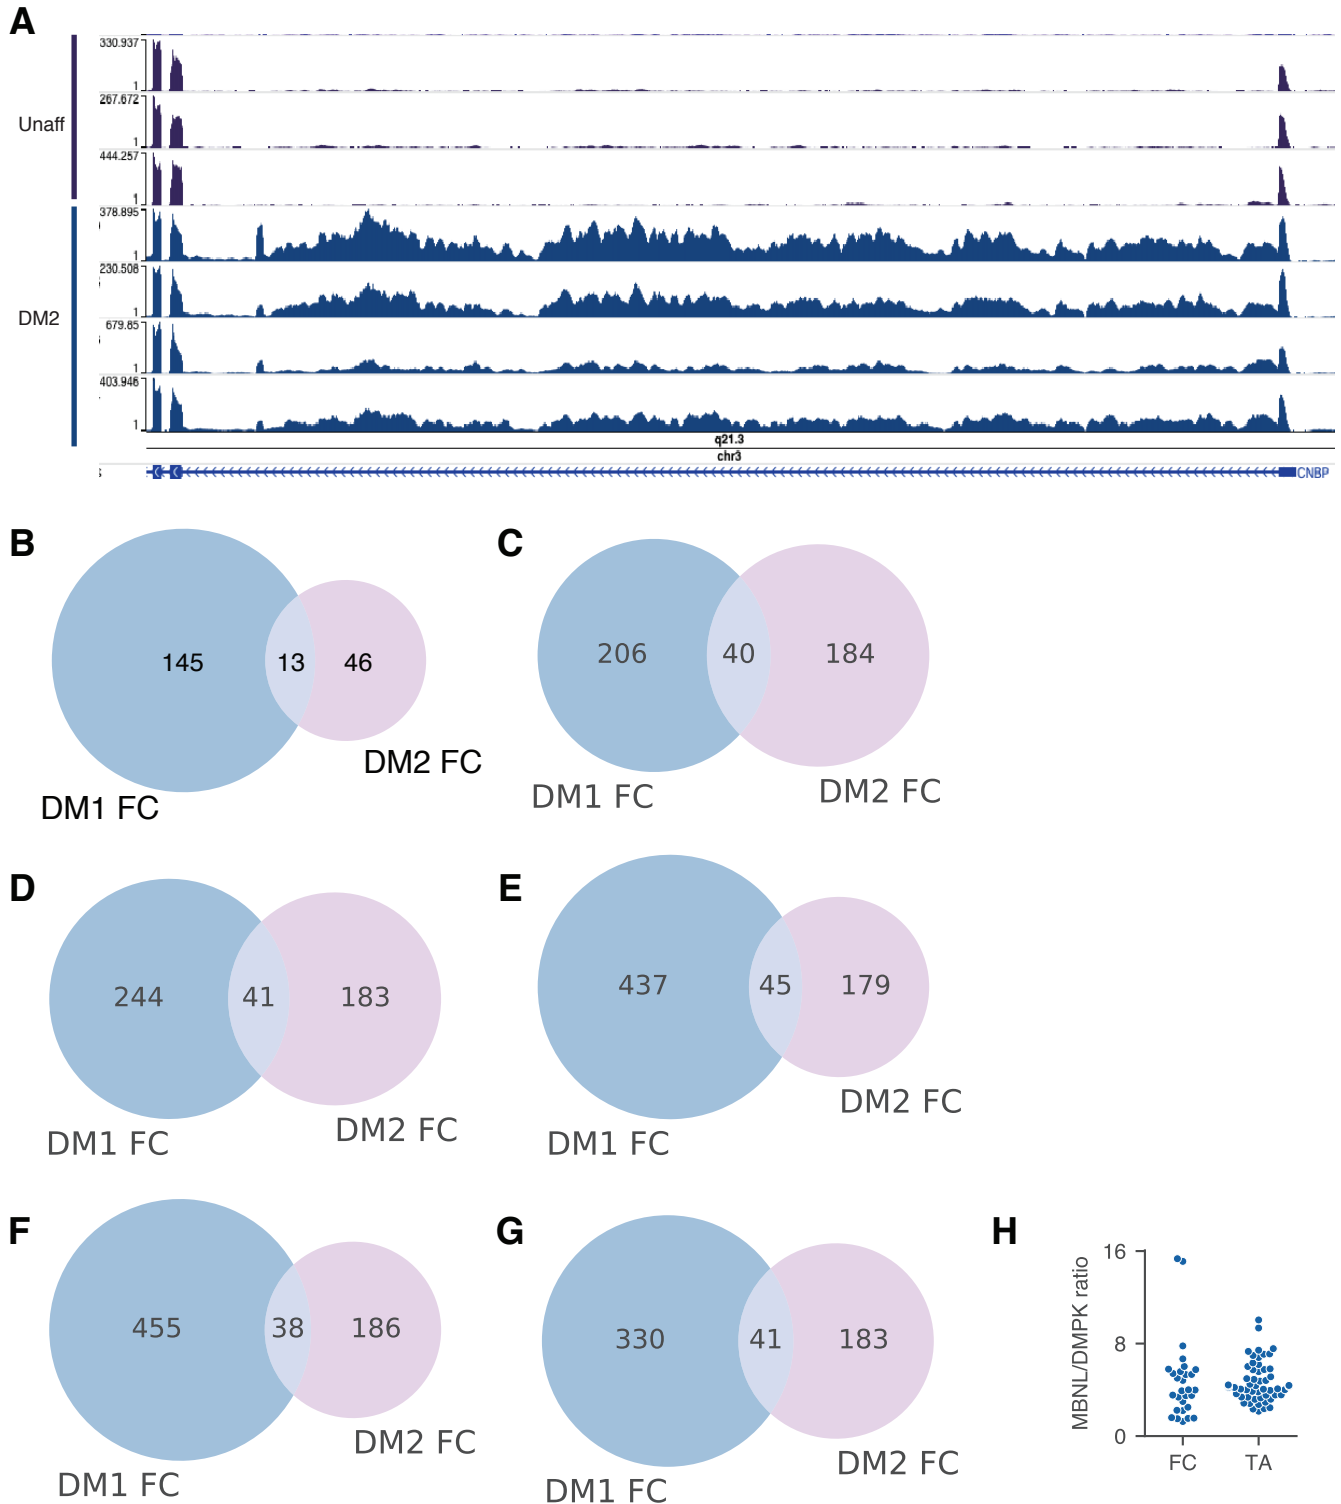

**Figure S3 (Related to Fig. 5). Small patient cohort size of DM2 limits global mis-splicing captured.** A) Intron 1 retention in CNBP is observed in DM2 samples, but not in 3 representative unaffected controls. B) Overlaps computed using  $|\Delta\psi| \geq 0.2$ ,  $p \leq 0.01$  (rank-sum test). C-E) Three separate random subsamples of the DM1 FC samples (4 DM1 patients, 8 unaffected controls) were used to compute the number of exons dysregulated in DM1, DM2, or both. All sub-samples show that 17-20% of the events dysregulated in DM1 were also dysregulated in DM2, using  $|\Delta\psi| \geq 0.1$ ,  $p \leq 0.01$  (rank-sum test). The number of events significantly regulated in DM1 FC samples ranged between ~25-50% of the total 968 identified when using all samples, as shown in Figure 5A. F) Overlap of events when analyzing the 4 least severe DM1 patients (according to total splicing dysregulation) versus DM2 patients. G) Overlap of events when analyzing the 4 most severe DM1 patients (according to total splicing dysregulation) versus DM2 patients. H) Ratio of DMPK to MBNL TPMs in frontal cortex and tibialis anterior.

**Figure S4**

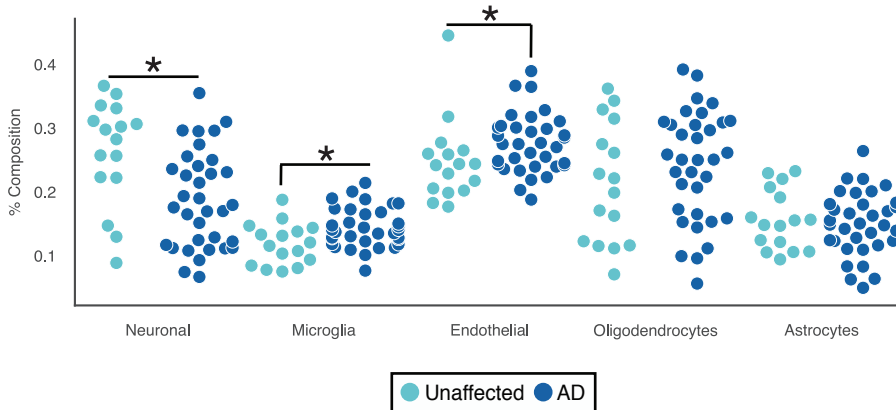

**Figure S4 (Related to Fig. 6). Cell composition analysis of the entorhinal cortex in AD patients shows significant neuronal loss, with increases in microglial and endothelial composition.** RNA-seq data derived from 34 Alzheimer's patients and 16 unaffected control entorhinal cortex samples were analyzed. We estimated cell type composition using our Bayesian Inference approach. By rank-sum test, AD patients were found to have significantly lower neuronal composition and significantly higher microglial and endothelial cell composition.
